# Supplementary material for: WDR46 is a Genetic Risk Factor for Aspirin-Exacerbated Respiratory Disease in a Korean Population
Source: PubMed Central journal article supplement — Allergy Asthma Immunol Res. 2012 Feb 23;4(4):199–205. doi: 10.4168/aair.2012.4.4.199 (PMC3378926; doi:10.4168/aair.2012.4.4.199), 2012-02-23
Supplement: aair-4-199-s001.pdf [file aair-4-199-s001.pdf]

**Supplementary Table 1.** Alleles and genotype distribution of *WDR46* SNPs

| SNP             | Position  | Allele | Genotype              | Heterozygosity | MAF    |            |          |           |          |
|-----------------|-----------|--------|-----------------------|----------------|--------|------------|----------|-----------|----------|
|                 |           |        |                       |                | Korean | Caucasian* | Chinese* | Japanese* | African* |
| <i>rs463260</i> | 5' UTR    | G>A    | G AG<br>90 78<br>A 19 | 0.428          | 0.310  | 0.500      | 0.350    | 0.330     | 0.714    |
| <i>rs446735</i> | Intron 8  | T>G    | T GT<br>91 79<br>G 19 | 0.427          | 0.310  | 0.500      | 0.358    | 0.332     | 0.719    |
| <i>rs466384</i> | Exon 10   | T>C    | T CT<br>161 24<br>C 2 | 0.139          | 0.075  | -          | -        | -         | -        |
| <i>rs455567</i> | Intron 10 | C>T    | C CT<br>90 78<br>T 19 | 0.428          | 0.310  | 0.500      | 0.358    | 0.329     | 0.732    |
| <i>rs469064</i> | Intron 10 | G>T    | G GT<br>90 79<br>T 17 | 0.423          | 0.304  | 0.495      | 0.354    | 0.324     | 0.246    |

SNP, single-nucleotide polymorphism; MAF, minor allele frequency; UTR, untranslated region.

\*Data taken from the International HapMap database (version: release #28; <http://www.hapmap.org>).

**Supplementary Table 2.** UTRScan output for *rs463260*

| SNP                   | Input sequence length* | UTRSite signal                    | Start and end positions of signal | Matched nucleotide sequence                                                                                                                                                                                                                                                                               |
|-----------------------|------------------------|-----------------------------------|-----------------------------------|-----------------------------------------------------------------------------------------------------------------------------------------------------------------------------------------------------------------------------------------------------------------------------------------------------------|
| <i>rs463260G&gt;A</i> | 361bases               | Upstream<br>Open Reading<br>Frame | 85-348                            | ATG<br>GCACCTAGAGAGCTTCATACCTGGTACGCTGCTGAT<br>TGGATGAAGGACAGAGGGCTCCGGGAGTTTTCAAG<br>CCGACTGTGTGGCAGCTGAGA[G/A]GAGTTTTGCACG<br>TGGATCGCCGTTCCGGTGGGCGAGATGGAGACAGCC<br>CCCAAGCCGGGCAAGGATGTCGCCCAAGAAAGA<br>CAAACCTCAGACCAAGAGAAAGGTAGAGGCCTCCCT<br>GGGTGGGAAACGAAGTTTTAGCTGTGGGGTCGGGG<br>GGCGGGGCG TGA |

Nucleotide sequence for the UTRsite signal is predicted using the UTRScan program (<http://itbtools.ba.itb.cnr.it/utrscan>).

\*FASTA sequence taken from National Center for Biotechnology Information (NCBI) database (<http://www.ncbi.nlm.nih.gov>).
